# Supplementary material for: Geographic and Socioeconomic Disparity of Gastric Cancer Patients in Canada
Source: MDPI journal article supplement (doi:10.3390/curroncol28030190), 2021-05-28
Supplement: s1 [file s1]

## Article

# Geographic and Socioeconomic Disparity of Gastric Cancer Patients in Canada

Leila Cattelan <sup>1</sup>, Feras M. Ghazawi <sup>2</sup>, Michelle Le <sup>1</sup>, François Lagacé <sup>1</sup>, Elham Rahme <sup>3</sup>, Andrei Zubarev <sup>1</sup>, Denis Sasseville <sup>1</sup>, Ivan V. Litvinov <sup>1</sup>, Kevin A. Waschke <sup>4</sup> and Elena Netchiporouk <sup>1,\*</sup>

- <sup>1</sup> Division of Dermatology, McGill University, Montreal, QC H4A 3J1, Canada; leila.cattelan@mail.mcgill.ca (L.C.); michelle.le@mail.mcgill.ca (M.L.); francois.lagace@mail.mcgill.ca (F.L.); andrei.zubarev@muhc.mcgill.ca (A.Z.); denis.sasseville@mcgill.ca (D.S.); ivan.litvinov@mcgill.ca (I.V.L.)
- <sup>2</sup> Division of Dermatology, University of Ottawa, Ottawa, ON K1N 6N5, Canada; feras.al-ghazawi@mail.mcgill.ca
- <sup>3</sup> Division of Clinical Epidemiology, McGill University, Montreal, QC H4A 3J1, Canada; elham.rahme@mcgill.ca
- <sup>4</sup> Division of Gastroenterology, McGill University, Montreal, QC H4A 3J1, Canada; kevin.waschke@mcgill.ca
- \* Correspondence: elena.netchiporouk@mcgill.ca

**Citation:** Cattelan, L.; Ghazawi, F.M.; Le, M.; Lagacé, F.; Rahme, E.; Zubarev, A.; Sasseville, D.; Litvinov, I.V.; Waschke, K.A.; Netchiporouk, E. Geographic and Socioeconomic Disparity of Gastric Cancer Patients in Canada. *Curr. Oncol.* **2021**, *28*, 2052–2064. <https://doi.org/10.3390/curroncol28030190>

Received: date  
Accepted: date  
Published: date

**Publisher's Note:** MDPI stays neutral with regard to jurisdictional claims in published maps and institutional affiliations.

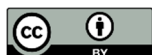

**Copyright:** © 2021 by the authors. Submitted for possible open access publication under the terms and conditions of the Creative Commons Attribution (CC BY) license (<http://creativecommons.org/licenses/by/4.0/>).

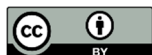

**Copyright:** © 2021 by the authors. Licensee MDPI, Basel, Switzerland. This article is an open access article distributed under the terms and conditions of the Creative Commons Attribution (CC BY) license (<http://creativecommons.org/licenses/by/4.0/>).

**Table S1.** Incidence of gastric adenocarcinoma in Canadian cities. Cities are divided into high incidence (A), and low incidence (B) compared to the average gastric cancer incidence rate in Canada. All case numbers are rounded to the nearest 5. All population numbers are rounded to the nearest thousand.

| <b>A: Highest frequency cities.</b> |                 |                  |                   |                                                   |                       |                       |
|-------------------------------------|-----------------|------------------|-------------------|---------------------------------------------------|-----------------------|-----------------------|
| <b>City</b>                         | <b>Province</b> | <b>Frequency</b> | <b>Population</b> | <b>Incidence per 100,000 individuals per year</b> | <b>Lower CI (95%)</b> | <b>Upper CI (95%)</b> |
| Yarmouth                            | NS              | 50               | 10400             | 25.30                                             | 18.78                 | 33.36                 |
| Dundas                              | ON              | 30               | 6240              | 25.30                                             | 17.07                 | 36.12                 |
| Okanagan-Similkameen D              | BC              | 25               | 5660              | 23.25                                             | 15.04                 | 34.32                 |
| Inverness, Subd. A                  | NS              | 25               | 5940              | 22.15                                             | 14.33                 | 32.70                 |
| Alnwick                             | ON              | 25               | 6380              | 20.62                                             | 13.34                 | 30.45                 |
| Comox-Strathcona B                  | BC              | 30               | 8010              | 19.71                                             | 13.30                 | 28.14                 |
| Cumberland, Subd. C                 | NS              | 20               | 5370              | 19.60                                             | 11.97                 | 30.28                 |
| Côte-Saint-Luc                      | QC              | 115              | 31860             | 19.00                                             | 15.68                 | 22.80                 |
| Bathurst                            | NB              | 45               | 12930             | 18.32                                             | 13.36                 | 24.51                 |
| Lac-Mégantic                        | QC              | 20               | 5920              | 17.78                                             | 10.86                 | 27.46                 |
| Trail                               | BC              | 25               | 7590              | 17.34                                             | 11.22                 | 25.59                 |
| Gaspé                               | QC              | 50               | 15360             | 17.13                                             | 12.72                 | 22.59                 |
| Joliette                            | QC              | 60               | 18510             | 17.06                                             | 13.02                 | 21.96                 |
| Campbellton                         | NB              | 25               | 7740              | 17.00                                             | 11.00                 | 25.10                 |
| Peace River                         | AB              | 20               | 6460              | 16.29                                             | 9.95                  | 25.17                 |
| Ponoka                              | AB              | 20               | 6460              | 16.29                                             | 9.95                  | 25.17                 |
| Dauphin                             | MB              | 25               | 8130              | 16.18                                             | 10.47                 | 23.89                 |
| Powell River                        | BC              | 40               | 13060             | 16.12                                             | 11.51                 | 21.95                 |
| Iroquois Falls                      | ON              | 15               | 5060              | 15.60                                             | 8.73                  | 25.74                 |
| Asbestos                            | QC              | 20               | 6820              | 15.43                                             | 9.42                  | 23.84                 |
| Shediac                             | NB              | 15               | 5280              | 14.95                                             | 8.36                  | 24.66                 |
| Stephenville                        | NF              | 20               | 7050              | 14.93                                             | 9.12                  | 23.06                 |
| Saint-Calixte                       | QC              | 15               | 5300              | 14.90                                             | 8.33                  | 24.57                 |
| Shippagan                           | NB              | 15               | 5480              | 14.41                                             | 8.06                  | 23.76                 |
| Vegreville                          | AB              | 15               | 5490              | 14.38                                             | 8.04                  | 23.72                 |
| Cowichan Valley B                   | BC              | 20               | 7340              | 14.34                                             | 8.76                  | 22.15                 |
| St. Andrews                         | NB              | 30               | 11020             | 14.33                                             | 9.67                  | 20.45                 |
| Sidney                              | BC              | 30               | 11030             | 14.32                                             | 9.66                  | 20.44                 |
| Inverness, Subd. B                  | NS              | 15               | 5600              | 14.10                                             | 7.88                  | 23.25                 |
| Athabasca County                    | AB              | 20               | 7530              | 13.98                                             | 8.54                  | 21.59                 |
| Beaver County                       | AB              | 15               | 5670              | 13.92                                             | 7.79                  | 22.97                 |
| Donnacona                           | QC              | 15               | 5770              | 13.68                                             | 7.65                  | 22.57                 |
| Qualicum Beach                      | BC              | 20               | 7710              | 13.65                                             | 8.34                  | 21.09                 |
| La Sarre                            | QC              | 20               | 7780              | 13.53                                             | 8.26                  | 20.90                 |
| Sainte-Julienne                     | QC              | 20               | 7820              | 13.46                                             | 8.22                  | 20.79                 |
| Happy Valley-Goose Bay              | NF              | 20               | 7940              | 13.26                                             | 8.09                  | 20.48                 |
| Gander                              | NF              | 25               | 10260             | 12.82                                             | 8.30                  | 18.93                 |
| Port Colborne                       | ON              | 45               | 18480             | 12.82                                             | 9.35                  | 17.15                 |
| Dolbeau-Mistassini                  | QC              | 35               | 14760             | 12.48                                             | 8.69                  | 17.36                 |
| Parksville                          | BC              | 25               | 10690             | 12.31                                             | 7.96                  | 18.17                 |
| Conception Bay South                | NF              | 50               | 21460             | 12.26                                             | 9.10                  | 16.17                 |
| Vanier                              | ON              | 25               | 11110             | 11.84                                             | 7.66                  | 17.48                 |
| Comox                               | BC              | 25               | 11120             | 11.83                                             | 7.66                  | 17.47                 |

|                  |    |     |        |       |      |       |
|------------------|----|-----|--------|-------|------|-------|
| Penticton        | BC | 70  | 31690  | 11.63 | 9.06 | 14.69 |
| Moncton          | NB | 140 | 63390  | 11.62 | 9.78 | 13.72 |
| Corner Brook     | NF | 45  | 20490  | 11.56 | 8.43 | 15.47 |
| St. John's       | NF | 220 | 101980 | 11.35 | 9.90 | 12.96 |
| Cape Breton      | NS | 220 | 105090 | 11.02 | 9.61 | 12.57 |
| Edmundston       | NB | 35  | 16980  | 10.85 | 7.56 | 15.09 |
| North Cowichan   | BC | 55  | 26950  | 10.74 | 8.09 | 13.98 |
| Magog            | QC | 50  | 24620  | 10.69 | 7.93 | 14.09 |
| Saint John       | NB | 140 | 70070  | 10.52 | 8.85 | 12.41 |
| Sault Ste. Marie | ON | 150 | 76180  | 10.36 | 8.77 | 12.16 |
| Sept-Îles        | QC | 50  | 25600  | 10.28 | 7.63 | 13.55 |
| Thetford Mines   | QC | 50  | 25710  | 10.24 | 7.60 | 13.49 |
| Nanaimo          | BC | 145 | 76410  | 9.99  | 8.43 | 11.75 |
| North Vancouver  | BC | 155 | 82430  | 9.90  | 8.40 | 11.58 |
| LaSalle          | QC | 135 | 73010  | 9.73  | 8.16 | 11.52 |
| Victoria         | BC | 140 | 76430  | 9.64  | 8.11 | 11.38 |
| Kelowna          | BC | 185 | 102520 | 9.50  | 8.18 | 10.97 |
| Niagara Falls    | ON | 140 | 80230  | 9.18  | 7.73 | 10.84 |

**B: Lowest frequency cities.**

| City                       | Province | Frequency | Population | Incidence per 100,000 individuals per year | Lower CI (95%) | Upper CI (95%) |
|----------------------------|----------|-----------|------------|--------------------------------------------|----------------|----------------|
| Saint-Bruno-de-Montarville | QC       | 70        | 72630      | 5.07                                       | 3.95           | 6.41           |
| Cochrane                   | AB       | 70        | 73000      | 5.05                                       | 3.93           | 6.38           |
| Mirabel                    | QC       | 85        | 89940      | 4.97                                       | 3.97           | 6.15           |
| Spruce Grove               | AB       | 25        | 26750      | 4.92                                       | 3.18           | 7.26           |
| West Lincoln               | ON       | 70        | 75380      | 4.89                                       | 3.81           | 6.18           |
| Orangeville                | ON       | 50        | 54060      | 4.87                                       | 3.61           | 6.42           |
| Coaldale                   | AB       | 110       | 119660     | 4.84                                       | 3.98           | 5.83           |
| Wainfleet                  | ON       | 70        | 76480      | 4.82                                       | 3.76           | 6.09           |
| St. Marys                  | ON       | 50        | 54800      | 4.80                                       | 3.56           | 6.33           |
| Lévis                      | QC       | 70        | 77790      | 4.74                                       | 3.69           | 5.98           |
| South Glengarry            | ON       | 20        | 22350      | 4.71                                       | 2.88           | 7.27           |
| Hull                       | ON       | 115       | 128820     | 4.70                                       | 3.88           | 5.64           |
| Cypress County             | AB       | 70        | 79120      | 4.66                                       | 3.63           | 5.88           |
| Kawartha Lakes             | ON       | 45        | 50980      | 4.65                                       | 3.39           | 6.22           |
| Scarborough                | ON       | 75        | 85670      | 4.61                                       | 3.62           | 5.78           |
| Bayham                     | ON       | 105       | 120000     | 4.61                                       | 3.77           | 5.58           |
| Essex                      | ON       | 35        | 40070      | 4.60                                       | 3.20           | 6.39           |
| Kingsclear                 | NB       | 85        | 98600      | 4.54                                       | 3.62           | 5.61           |
| Ottawa                     | ON       | 20        | 23360      | 4.51                                       | 2.75           | 6.96           |
| Lachenaie                  | QC       | 505       | 590000     | 4.50                                       | 4.12           | 4.92           |
| Québec                     | QC       | 330       | 387850     | 4.48                                       | 4.01           | 4.99           |
| L'Île-Bizard               | QC       | 135       | 159670     | 4.45                                       | 3.73           | 5.27           |
| Carignan                   | QC       | 90        | 107130     | 4.42                                       | 3.56           | 5.43           |
| Saint-Hippolyte            | QC       | 75        | 90190      | 4.38                                       | 3.44           | 5.49           |
| EAST YORK                  | ON       | 15        | 18040      | 4.38                                       | 2.45           | 7.22           |
| Clearview                  | ON       | 50        | 61780      | 4.26                                       | 3.16           | 5.62           |
| Edwardsburgh/Cardinal      | ON       | 15        | 18610      | 4.24                                       | 2.37           | 7.00           |
| Etobicoke                  | ON       | 20        | 25180      | 4.18                                       | 2.55           | 6.46           |

|                                 |    |     |        |      |      |      |
|---------------------------------|----|-----|--------|------|------|------|
| Drummond/North Elmsley          | ON | 55  | 69300  | 4.18 | 3.15 | 5.44 |
| Banff                           | AB | 20  | 25250  | 4.17 | 2.55 | 6.44 |
| Val-Bélair                      | QC | 25  | 31630  | 4.16 | 2.69 | 6.14 |
| Sainte-Anne-des-Monts--Tourelle | QC | 15  | 18990  | 4.16 | 2.33 | 6.86 |
| La Pêche                        | QC | 20  | 25410  | 4.14 | 2.53 | 6.40 |
| Olds                            | AB | 105 | 134390 | 4.11 | 3.36 | 4.98 |
| Barrie                          | ON | 50  | 64290  | 4.09 | 3.04 | 5.40 |
| Bluewater                       | ON | 55  | 71220  | 4.06 | 3.06 | 5.29 |
| Morinville                      | AB | 430 | 559000 | 4.05 | 3.67 | 4.45 |
| Ajax                            | ON | 15  | 19790  | 3.99 | 2.23 | 6.58 |
| Saint-Élie-d'Orford             | QC | 635 | 848000 | 3.94 | 3.64 | 4.26 |
| Saint-Basile-le-Grand           | QC | 15  | 20100  | 3.93 | 2.20 | 6.48 |
| East Zorra-Tavistock            | ON | 375 | 503880 | 3.92 | 3.53 | 4.33 |
| Delson                          | QC | 10  | 13450  | 3.91 | 1.87 | 7.20 |
| Cantley                         | QC | 80  | 108000 | 3.90 | 3.09 | 4.85 |
| Aurora                          | ON | 10  | 13510  | 3.90 | 1.87 | 7.16 |
| St. Clair                       | ON | 270 | 365140 | 3.89 | 3.44 | 4.38 |
| Central Okanagan                | BC | 15  | 20750  | 3.80 | 2.13 | 6.28 |
| Middlesex Centre                | ON | 80  | 111760 | 3.77 | 2.99 | 4.69 |
| Stone Mills                     | ON | 60  | 84490  | 3.74 | 2.85 | 4.81 |
| Fort Saskatchewan               | AB | 10  | 14120  | 3.73 | 1.78 | 6.86 |
| Candiac                         | QC | 30  | 43960  | 3.59 | 2.42 | 5.13 |
| Loyalist                        | ON | 10  | 14730  | 3.57 | 1.71 | 6.57 |
| Greater Napanee                 | ON | 10  | 14790  | 3.56 | 1.70 | 6.54 |
| South-West Oxford               | ON | 10  | 14830  | 3.55 | 1.70 | 6.53 |
| Trois-Rivières-Ouest            | QC | 10  | 14880  | 3.54 | 1.69 | 6.51 |
| Okotoks                         | AB | 10  | 15080  | 3.49 | 1.67 | 6.42 |
| Wheatland County                | AB | 10  | 15110  | 3.48 | 1.67 | 6.41 |
| Kenora                          | ON | 10  | 15260  | 3.45 | 1.65 | 6.34 |
| Port Hope and Hope              | ON | 15  | 23090  | 3.42 | 1.91 | 5.64 |
| Dollard-des-Ormeaux             | QC | 10  | 15460  | 3.40 | 1.63 | 6.26 |
| Vaudreuil-Dorion                | QC | 10  | 15680  | 3.36 | 1.61 | 6.17 |
| Bois-des-Filion                 | QC | 10  | 15910  | 3.31 | 1.58 | 6.08 |
| Fleurimont                      | QC | 30  | 48020  | 3.29 | 2.22 | 4.69 |
| Minto                           | ON | 15  | 24370  | 3.24 | 1.81 | 5.34 |
| Brant                           | ON | 10  | 16390  | 3.21 | 1.54 | 5.91 |
| Centre Wellington               | ON | 20  | 32880  | 3.20 | 1.95 | 4.94 |
| Blainville                      | QC | 15  | 24700  | 3.20 | 1.79 | 5.27 |
| Fort Frances                    | ON | 25  | 41410  | 3.18 | 2.06 | 4.69 |
| Springwater                     | ON | 10  | 16640  | 3.16 | 1.51 | 5.82 |
| Terrebonne                      | QC | 60  | 100510 | 3.14 | 2.40 | 4.04 |
| Fort St. John                   | BC | 10  | 16770  | 3.14 | 1.50 | 5.77 |
| Quinte West                     | ON | 25  | 42220  | 3.12 | 2.02 | 4.60 |
| Grande Prairie                  | QC | 25  | 42620  | 3.09 | 2.00 | 4.56 |
| Cavan-Millbrook-North Monaghan  | ON | 5   | 8530   | 3.09 | 0.99 | 7.20 |
| Le Gardeur                      | QC | 10  | 17260  | 3.05 | 1.46 | 5.61 |
| Whitecourt                      | AB | 5   | 8670   | 3.04 | 0.98 | 7.08 |
| Gatineau                        | QC | 145 | 253740 | 3.01 | 2.54 | 3.54 |
| Val-des-Monts                   | QC | 5   | 8760   | 3.00 | 0.97 | 7.01 |

|                                |    |    |        |      |      |      |
|--------------------------------|----|----|--------|------|------|------|
| Saint-Augustin-de-Desmaures    | QC | 10 | 17710  | 2.97 | 1.42 | 5.47 |
| Strathmore                     | AB | 5  | 8880   | 2.96 | 0.96 | 6.92 |
| Masson-Angers                  | QC | 5  | 8890   | 2.96 | 0.95 | 6.91 |
| Airdrie                        | AB | 15 | 26950  | 2.93 | 1.64 | 4.83 |
| Stoney Creek                   | ON | 30 | 54000  | 2.92 | 1.97 | 4.17 |
| Foothills County               | AB | 10 | 18020  | 2.92 | 1.40 | 5.37 |
| Taché                          | MB | 5  | 9050   | 2.91 | 0.94 | 6.79 |
| Saint-Colomban                 | QC | 5  | 9080   | 2.90 | 0.93 | 6.76 |
| Sainte-Julie                   | QC | 15 | 27450  | 2.88 | 1.61 | 4.74 |
| Grey Highlands                 | ON | 5  | 9200   | 2.86 | 0.92 | 6.68 |
| Carleton Place                 | ON | 5  | 9210   | 2.86 | 0.92 | 6.67 |
| Leeds and the Thousand Islands | ON | 5  | 9240   | 2.85 | 0.92 | 6.65 |
| Lorraine                       | QC | 5  | 9360   | 2.81 | 0.91 | 6.56 |
| Oro-Medonte                    | ON | 10 | 18780  | 2.80 | 1.34 | 5.15 |
| Prévost                        | QC | 5  | 9470   | 2.78 | 0.90 | 6.48 |
| Dartmouth                      | NS | 35 | 67570  | 2.73 | 1.90 | 3.79 |
| Hinton                         | AB | 5  | 9690   | 2.72 | 0.88 | 6.34 |
| Saint-Luc                      | QC | 10 | 19470  | 2.70 | 1.29 | 4.97 |
| Woolwich                       | ON | 10 | 19580  | 2.69 | 1.29 | 4.94 |
| Brighton                       | ON | 5  | 9910   | 2.66 | 0.86 | 6.20 |
| Rideau Lakes                   | ON | 5  | 9950   | 2.64 | 0.85 | 6.17 |
| Varennes                       | QC | 10 | 20110  | 2.62 | 1.25 | 4.81 |
| Milton                         | ON | 25 | 50460  | 2.61 | 1.69 | 3.85 |
| Lakeshore                      | ON | 15 | 30670  | 2.57 | 1.44 | 4.25 |
| Whitehorse                     | YT | 10 | 20490  | 2.57 | 1.23 | 4.72 |
| Scugog                         | ON | 10 | 20500  | 2.57 | 1.23 | 4.72 |
| Clarence-Rockland              | ON | 10 | 20560  | 2.56 | 1.23 | 4.71 |
| Yellowknife                    | NT | 70 | 144220 | 2.55 | 1.99 | 3.23 |
| Saguenay                       | QC | 10 | 20730  | 2.54 | 1.22 | 4.67 |
| Amherstburg                    | ON | 5  | 10420  | 2.53 | 0.81 | 5.89 |
| Temiskaming Shores             | ON | 5  | 10750  | 2.45 | 0.79 | 5.71 |
| South Dundas                   | ON | 5  | 10850  | 2.43 | 0.78 | 5.66 |
| The Nation Municipality        | ON | 5  | 10910  | 2.41 | 0.78 | 5.63 |
| Erin                           | ON | 5  | 10990  | 2.39 | 0.77 | 5.59 |
| Williams Lake                  | BC | 5  | 11210  | 2.35 | 0.76 | 5.48 |
| Wellington North               | ON | 5  | 11320  | 2.32 | 0.75 | 5.43 |
| Kincardine                     | ON | 5  | 11450  | 2.30 | 0.74 | 5.36 |
| Guelph/Eramosa                 | ON | 5  | 11950  | 2.20 | 0.71 | 5.14 |
| West Grey                      | ON | 5  | 11960  | 2.20 | 0.71 | 5.13 |
| Saugeen Shores                 | ON | 20 | 48440  | 2.17 | 1.33 | 3.36 |
| Wood Buffalo                   | AB | 20 | 49280  | 2.14 | 1.30 | 3.30 |
| Cap-Rouge                      | QC | 5  | 16120  | 1.63 | 0.53 | 3.81 |
| Saint-Nicolas                  | QC | 5  | 17120  | 1.54 | 0.50 | 3.59 |
| South Frontenac                | ON | 5  | 17940  | 1.47 | 0.47 | 3.42 |

**Table S2.** List of Populous Forward Sortation Areas (FSA) in Canada with high (A) and zero (B) incidence of gastric adenocarcinoma from 1992 to 2010. All population numbers are rounded to the nearest ten.

| A: High Incidence |              |           |            |                                                                      |                 |                 |
|-------------------|--------------|-----------|------------|----------------------------------------------------------------------|-----------------|-----------------|
| FSA               | Province     | Frequency | Population | Age- Standardized Incidence Rate per 100,000<br>Individuals per Year | Lower 95%<br>CI | Upper 95%<br>CI |
| A0M               | NF           | 40        | 8850       | 23.79                                                                | 16.99           | 32.39           |
| A0B               | NF           | 95        | 23610      | 21.18                                                                | 17.13           | 25.89           |
| A0L               | NF           | 30        | 7670       | 20.59                                                                | 13.89           | 29.39           |
| H4W               | QC           | 90        | 23300      | 20.33                                                                | 16.35           | 24.99           |
| G0E               | QC           | 45        | 11790      | 20.09                                                                | 14.65           | 26.88           |
| A0N               | NF           | 55        | 14860      | 19.48                                                                | 14.67           | 25.36           |
| A0E               | NF           | 105       | 29000      | 19.06                                                                | 15.59           | 23.07           |
| G0T               | QC           | 60        | 16790      | 18.81                                                                | 14.35           | 24.21           |
| A0G               | NF           | 140       | 39840      | 18.50                                                                | 15.56           | 21.83           |
| A0H               | NF           | 70        | 20470      | 18.00                                                                | 14.03           | 22.74           |
| V6A               | BC           | 55        | 16530      | 17.51                                                                | 13.19           | 22.79           |
| B0E               | NS           | 100       | 30100      | 17.49                                                                | 14.23           | 21.27           |
| B2A               | NS           | 30        | 9070       | 17.41                                                                | 11.74           | 24.85           |
| J1T               | QC           | 25        | 7860       | 16.74                                                                | 10.83           | 24.71           |
| H3V               | QC           | 20        | 6550       | 16.07                                                                | 9.81            | 24.82           |
| G6B               | QC           | 25        | 8280       | 15.89                                                                | 10.28           | 23.46           |
| V1R               | BC           | 30        | 9950       | 15.87                                                                | 10.70           | 22.65           |
| A0A               | NF           | 160       | 53640      | 15.70                                                                | 13.36           | 18.33           |
| G0C               | QC           | 155       | 52350      | 15.58                                                                | 13.23           | 18.24           |
| H7V               | QC           | 60        | 20490      | 15.41                                                                | 11.76           | 19.84           |
| B1S               | NS           | 25        | 8550       | 15.39                                                                | 9.96            | 22.72           |
| R2H               | MB           | 45        | 15480      | 15.30                                                                | 11.16           | 20.47           |
| H1T               | QC           | 85        | 29600      | 15.11                                                                | 12.07           | 18.69           |
| A1B               | NF           | 50        | 17450      | 15.08                                                                | 11.19           | 19.88           |
| M2R               | ON (Toronto) | 110       | 38430      | 15.06                                                                | 12.38           | 18.16           |
| T9C               | AB           | 20        | 7010       | 15.02                                                                | 9.17            | 23.19           |
| B1A               | NS           | 50        | 17680      | 14.88                                                                | 11.05           | 19.62           |
| A1Y               | NF           | 15        | 5320       | 14.84                                                                | 8.30            | 24.48           |
| L8R               | ON (central) | 30        | 10650      | 14.83                                                                | 10.00           | 21.17           |
| A0K               | NF           | 100       | 35830      | 14.69                                                                | 11.95           | 17.87           |
| G5H               | QC           | 20        | 7260       | 14.50                                                                | 8.85            | 22.39           |
| R2X               | MB           | 45        | 16360      | 14.48                                                                | 10.56           | 19.37           |
| T5L               | AB           | 45        | 16390      | 14.45                                                                | 10.54           | 19.34           |
| A2N               | NF           | 25        | 9110       | 14.44                                                                | 9.34            | 21.32           |
| A1E               | NF           | 80        | 29400      | 14.32                                                                | 11.36           | 17.82           |
| E2L               | NB           | 30        | 11050      | 14.29                                                                | 9.64            | 20.40           |
| G6G               | QC           | 55        | 20420      | 14.18                                                                | 10.68           | 18.45           |
| M2M               | ON (Toronto) | 80        | 29990      | 14.04                                                                | 11.13           | 17.47           |
| H4V               | QC           | 55        | 20620      | 14.04                                                                | 10.57           | 18.27           |
| G8L               | QC           | 35        | 13190      | 13.97                                                                | 9.73            | 19.42           |
| G0Y               | QC           | 25        | 9450       | 13.92                                                                | 9.01            | 20.56           |
| G0J               | QC           | 95        | 36050      | 13.87                                                                | 11.22           | 16.96           |
| M6L               | ON (Toronto) | 55        | 20950      | 13.82                                                                | 10.41           | 17.99           |
| H4G               | QC           | 75        | 28700      | 13.75                                                                | 10.82           | 17.24           |
| B5A               | NS           | 35        | 13400      | 13.75                                                                | 9.57            | 19.12           |
| G0H               | QC           | 30        | 11610      | 13.60                                                                | 9.17            | 19.42           |
| H1P               | QC           | 45        | 17420      | 13.60                                                                | 9.92            | 18.19           |
| B0H               | NS           | 30        | 11630      | 13.58                                                                | 9.16            | 19.38           |
| V0S               | BC           | 25        | 9710       | 13.55                                                                | 8.77            | 20.00           |

|     |               |     |       |       |       |       |
|-----|---------------|-----|-------|-------|-------|-------|
| H4H | QC            | 50  | 19480 | 13.51 | 10.03 | 17.81 |
| G7X | QC            | 70  | 27310 | 13.49 | 10.52 | 17.04 |
| M8Z | ON (Toronto)  | 35  | 13670 | 13.48 | 9.38  | 18.74 |
| P0A | ON (Northern) | 40  | 15710 | 13.40 | 9.57  | 18.25 |
| M3M | ON (Toronto)  | 60  | 23730 | 13.31 | 10.15 | 17.13 |
| H1J | QC            | 25  | 9900  | 13.29 | 8.60  | 19.62 |
| V8A | BC            | 45  | 17930 | 13.21 | 9.63  | 17.68 |
| V0X | BC            | 50  | 19960 | 13.18 | 9.78  | 17.38 |
| V1Y | BC            | 80  | 31970 | 13.17 | 10.44 | 16.39 |
| R7N | MB            | 25  | 10090 | 13.04 | 8.44  | 19.25 |
| J9Z | QC            | 20  | 8090  | 13.01 | 7.94  | 20.10 |
| E3N | NB            | 35  | 14170 | 13.00 | 9.05  | 18.08 |
| J9E | QC            | 20  | 8100  | 13.00 | 7.93  | 20.07 |
| L8K | ON (central)  | 80  | 32510 | 12.95 | 10.27 | 16.12 |
| H8P | QC            | 55  | 22410 | 12.92 | 9.73  | 16.81 |
| A1C | NF            | 35  | 14280 | 12.90 | 8.98  | 17.94 |
| A1V | NF            | 25  | 10260 | 12.82 | 8.30  | 18.93 |
| H2A | QC            | 45  | 18510 | 12.80 | 9.33  | 17.12 |
| B0M | NS            | 45  | 18570 | 12.75 | 9.30  | 17.07 |
| H1R | QC            | 70  | 29060 | 12.68 | 9.88  | 16.02 |
| V8S | BC            | 40  | 16630 | 12.66 | 9.04  | 17.24 |
| S4P | SK            | 30  | 12480 | 12.65 | 8.53  | 18.06 |
| M9C | ON (Toronto)  | 85  | 35630 | 12.56 | 10.03 | 15.53 |
| G1E | QC            | 60  | 25180 | 12.54 | 9.57  | 16.14 |
| E1X | NB            | 30  | 12620 | 12.51 | 8.44  | 17.86 |
| E2A | NB            | 45  | 18940 | 12.50 | 9.12  | 16.73 |
| G5C | QC            | 30  | 12740 | 12.39 | 8.36  | 17.69 |
| J4K | QC            | 60  | 25480 | 12.39 | 9.46  | 15.95 |
| L8T | ON (central)  | 45  | 19270 | 12.29 | 8.96  | 16.45 |
| H2B | QC            | 40  | 17150 | 12.28 | 8.77  | 16.72 |
| P7B | ON (Northern) | 70  | 30130 | 12.23 | 9.53  | 15.45 |
| H3N | QC            | 70  | 30160 | 12.22 | 9.52  | 15.43 |
| J0V | QC            | 60  | 25860 | 12.21 | 9.32  | 15.72 |
| L2T | ON (central)  | 25  | 10780 | 12.21 | 7.90  | 18.02 |
| H4E | QC            | 70  | 30230 | 12.19 | 9.50  | 15.40 |
| J8H | QC            | 30  | 13050 | 12.10 | 8.16  | 17.27 |
| T2G | AB            | 25  | 10900 | 12.07 | 7.81  | 17.82 |
| R2V | MB            | 70  | 30570 | 12.05 | 9.39  | 15.23 |
| H1Z | QC            | 80  | 34950 | 12.05 | 9.55  | 14.99 |
| S0A | SK            | 130 | 56930 | 12.02 | 10.04 | 14.27 |
| S4H | SK            | 25  | 10980 | 11.98 | 7.75  | 17.69 |
| A0C | NF            | 35  | 15380 | 11.98 | 8.34  | 16.66 |
| G0R | QC            | 190 | 83590 | 11.96 | 10.32 | 13.79 |
| G6V | QC            | 80  | 35200 | 11.96 | 9.48  | 14.89 |
| E1V | NB            | 30  | 13220 | 11.94 | 8.06  | 17.05 |
| M1R | ON (Toronto)  | 65  | 28730 | 11.91 | 9.19  | 15.18 |
| P3E | ON (Northern) | 60  | 26580 | 11.88 | 9.07  | 15.29 |
| J3R | QC            | 30  | 13310 | 11.86 | 8.00  | 16.94 |
| G0B | QC            | 30  | 13320 | 11.85 | 8.00  | 16.92 |
| M9M | ON (Toronto)  | 45  | 19980 | 11.85 | 8.65  | 15.86 |
| G5L | QC            | 70  | 31210 | 11.80 | 9.20  | 14.91 |
| H1G | QC            | 110 | 49110 | 11.79 | 9.69  | 14.21 |
| H1S | QC            | 50  | 22340 | 11.78 | 8.74  | 15.53 |
| H7G | QC            | 45  | 20140 | 11.76 | 8.58  | 15.74 |

|     |               |     |       |       |      |       |
|-----|---------------|-----|-------|-------|------|-------|
| H2E | QC            | 55  | 24670 | 11.73 | 8.84 | 15.27 |
| E1C | NB            | 65  | 29160 | 11.73 | 9.05 | 14.95 |
| J6E | QC            | 85  | 38200 | 11.71 | 9.35 | 14.48 |
| M6C | ON (Toronto)  | 55  | 24730 | 11.71 | 8.82 | 15.24 |
| G0M | QC            | 80  | 36030 | 11.69 | 9.27 | 14.54 |
| V9K | BC            | 30  | 13530 | 11.67 | 7.87 | 16.66 |
| M9P | ON (Toronto)  | 45  | 20350 | 11.64 | 8.49 | 15.57 |
| T5B | AB            | 35  | 15890 | 11.59 | 8.07 | 16.12 |
| G1V | QC            | 40  | 18170 | 11.59 | 8.28 | 15.78 |
| M4A | ON (Toronto)  | 30  | 13670 | 11.55 | 7.79 | 16.49 |
| J6S | QC            | 50  | 22830 | 11.53 | 8.55 | 15.20 |
| G1K | QC            | 40  | 18270 | 11.52 | 8.23 | 15.69 |
| G1L | QC            | 50  | 22920 | 11.48 | 8.52 | 15.14 |
| H1M | QC            | 60  | 27510 | 11.48 | 8.76 | 14.78 |
| H1H | QC            | 75  | 34700 | 11.38 | 8.95 | 14.26 |
| M6A | ON (Toronto)  | 40  | 18530 | 11.36 | 8.12 | 15.47 |
| V0H | BC            | 110 | 50980 | 11.36 | 9.33 | 13.69 |
| G7B | QC            | 40  | 18620 | 11.31 | 8.08 | 15.40 |
| G7H | QC            | 65  | 30260 | 11.31 | 8.72 | 14.41 |
| H1L | QC            | 70  | 32650 | 11.28 | 8.80 | 14.26 |
| L3K | ON (central)  | 40  | 18660 | 11.28 | 8.06 | 15.36 |
| V2A | BC            | 75  | 35040 | 11.27 | 8.86 | 14.12 |
| M6E | ON (Toronto)  | 85  | 39790 | 11.24 | 8.98 | 13.90 |
| V5H | BC            | 70  | 32850 | 11.22 | 8.74 | 14.17 |
| T5E | AB            | 65  | 30550 | 11.20 | 8.64 | 14.27 |
| M9B | ON (Toronto)  | 60  | 28220 | 11.19 | 8.54 | 14.40 |
| P6B | ON (Northern) | 50  | 23620 | 11.14 | 8.27 | 14.69 |
| V8V | BC            | 50  | 23770 | 11.07 | 8.22 | 14.60 |
| T1A | AB            | 55  | 26160 | 11.07 | 8.34 | 14.40 |
| L2E | ON (central)  | 45  | 21410 | 11.06 | 8.07 | 14.80 |
| E2M | NB            | 40  | 19130 | 11.01 | 7.86 | 14.99 |
| H1X | QC            | 60  | 28820 | 10.96 | 8.36 | 14.10 |
| G0N | QC            | 45  | 21630 | 10.95 | 7.99 | 14.65 |
| J1X | QC            | 55  | 26440 | 10.95 | 8.25 | 14.25 |
| T6C | AB            | 40  | 19230 | 10.95 | 7.82 | 14.91 |
| J1G | QC            | 40  | 19250 | 10.94 | 7.81 | 14.89 |
| H8N | QC            | 55  | 26490 | 10.93 | 8.23 | 14.22 |
| J0G | QC            | 40  | 19270 | 10.93 | 7.80 | 14.88 |
| S0G | SK            | 130 | 62640 | 10.92 | 9.13 | 12.97 |
| M6N | ON (Toronto)  | 85  | 41110 | 10.88 | 8.69 | 13.46 |
| V5M | BC            | 45  | 21790 | 10.87 | 7.93 | 14.54 |
| G0L | QC            | 130 | 63010 | 10.86 | 9.07 | 12.89 |
| M3J | ON (Toronto)  | 50  | 24270 | 10.84 | 8.05 | 14.30 |
| J7Y | QC            | 40  | 19470 | 10.81 | 7.72 | 14.72 |
| R3M | MB            | 45  | 22090 | 10.72 | 7.82 | 14.35 |
| M6J | ON (Toronto)  | 60  | 29530 | 10.69 | 8.16 | 13.77 |
| L8G | ON (central)  | 45  | 22200 | 10.67 | 7.78 | 14.28 |
| M1S | ON (Toronto)  | 70  | 34650 | 10.63 | 8.29 | 13.43 |
| M3H | ON (Toronto)  | 65  | 32210 | 10.62 | 8.20 | 13.54 |
| S4T | SK            | 65  | 32350 | 10.58 | 8.16 | 13.48 |
| M1W | ON (Toronto)  | 100 | 49910 | 10.55 | 8.58 | 12.83 |
| G0W | QC            | 80  | 40030 | 10.52 | 8.34 | 13.09 |
| R2K | MB            | 65  | 32530 | 10.52 | 8.12 | 13.40 |
| T5R | AB            | 50  | 25050 | 10.51 | 7.80 | 13.85 |



|     |              |     |        |       |      |       |
|-----|--------------|-----|--------|-------|------|-------|
| H1E | QC           | 85  | 42650  | 10.49 | 8.38 | 12.97 |
| L0K | ON (central) | 65  | 32700  | 10.46 | 8.07 | 13.33 |
| M6H | ON (Toronto) | 90  | 45300  | 10.46 | 8.41 | 12.85 |
| M6G | ON (Toronto) | 65  | 32970  | 10.38 | 8.01 | 13.23 |
| R2W | MB           | 55  | 27960  | 10.35 | 7.80 | 13.48 |
| J9X | QC           | 55  | 28000  | 10.34 | 7.79 | 13.46 |
| M4J | ON (Toronto) | 70  | 35710  | 10.32 | 8.04 | 13.04 |
| M6M | ON (Toronto) | 80  | 40870  | 10.30 | 8.17 | 12.82 |
| M1T | ON (Toronto) | 65  | 33240  | 10.29 | 7.94 | 13.12 |
| J0Z | QC           | 75  | 38540  | 10.24 | 8.06 | 12.84 |
| V1T | BC           | 60  | 31040  | 10.17 | 7.76 | 13.10 |
| M6K | ON (Toronto) | 65  | 33900  | 10.09 | 7.79 | 12.86 |
| R0C | MB           | 95  | 49560  | 10.09 | 8.16 | 12.33 |
| M3N | ON (Toronto) | 85  | 44820  | 9.98  | 7.97 | 12.34 |
| T0B | AB           | 110 | 60550  | 9.56  | 7.86 | 11.52 |
| J0K | QC           | 240 | 132200 | 9.55  | 8.38 | 10.84 |
| G0S | QC           | 120 | 68000  | 9.29  | 7.70 | 11.11 |

**B: Zero Incidence**

| FSA | Province | Frequency | Population | Incidence per 100,000 individuals per year | Lower CI (95%) | Upper CI (95%) |
|-----|----------|-----------|------------|--------------------------------------------|----------------|----------------|
| V8B | BC       | 0         | 5950       | 0                                          | 0              | 3.24           |
| J9B | QC       | 0         | 6560       | 0                                          | 0              | 2.94           |
| J5B | QC       | 0         | 7370       | 0                                          | 0              | 2.62           |
| G3B | QC       | 0         | 7430       | 0                                          | 0              | 2.60           |
| G3C | QC       | 0         | 7660       | 0                                          | 0              | 2.52           |
| G3H | QC       | 0         | 7810       | 0                                          | 0              | 2.47           |
| T3M | AB       | 0         | 7950       | 0                                          | 0              | 2.43           |
| V9Z | BC       | 0         | 15610      | 0                                          | 0              | 1.24           |
| A0A | NF       | 0         | 53640      | 0                                          | 0              | 0.36           |

**Table S3.** List of Populous Forward Sortation Areas (FSA) in Canada With High Incidence of gastric adenocarcinoma from 1992 to 2010, sorted by their association with either urban or rural areas of the country. All population numbers are rounded to the nearest ten. ASIR highlighted in yellow represent the eleven FSAs had an ASIRs  $\geq 3$ -fold that of the national average. (NF: Newfoundland and Labrador, NS: Nova Scotia, NB: New Brunswick, QC: Quebec, ON: Ontario, MB: Manitoba, SK: Saskatchewan, AB: Alberta, BC: British Columbia).

|           | FSA | Province   | Frequency | Population | ASIR per 100,000 | Individuals per Year | Lower 95% CI | Upper 95% CI |
|-----------|-----|------------|-----------|------------|------------------|----------------------|--------------|--------------|
| RURAL FSA | A0A | NF         | 160       | 53640      |                  | 15.70                | 13.36        | 18.33        |
|           | A0B |            | 95        | 23610      |                  | 21.18                | 17.13        | 25.89        |
|           | A0C |            | 35        | 15380      |                  | 11.98                | 8.34         | 16.66        |
|           | A0E |            | 105       | 29000      |                  | 19.06                | 15.59        | 23.07        |
|           | A0G |            | 140       | 39840      |                  | 18.50                | 15.56        | 21.83        |
|           | A0H |            | 70        | 20470      |                  | 18.00                | 14.03        | 22.74        |
|           | A0K |            | 100       | 35830      |                  | 14.69                | 11.95        | 17.87        |
|           | A0L |            | 30        | 7670       |                  | 20.59                | 13.89        | 29.39        |
|           | A0M |            | 40        | 8850       |                  | 23.79                | 16.99        | 32.39        |
|           | A0N |            | 55        | 14860      |                  | 19.48                | 14.67        | 25.36        |
|           | B0E | NS         | 100       | 30100      |                  | 17.49                | 14.23        | 21.27        |
|           | B0H |            | 30        | 11630      |                  | 13.58                | 9.16         | 19.38        |
|           | B0M |            | 45        | 18570      |                  | 12.75                | 9.30         | 17.07        |
|           | G0B | QC         | 30        | 13320      |                  | 11.85                | 8.00         | 16.92        |
|           | G0C |            | 155       | 52350      |                  | 15.58                | 13.23        | 18.24        |
|           | G0E |            | 45        | 11790      |                  | 20.09                | 14.65        | 26.88        |
|           | G0H |            | 30        | 11610      |                  | 13.60                | 9.17         | 19.42        |
|           | G0J |            | 95        | 36050      |                  | 13.87                | 11.22        | 16.96        |
|           | G0L |            | 130       | 63010      |                  | 10.86                | 9.07         | 12.89        |
|           | G0M |            | 80        | 36030      |                  | 11.69                | 9.27         | 14.54        |
|           | G0N |            | 45        | 21630      |                  | 10.95                | 7.99         | 14.65        |
|           | G0R |            | 190       | 83590      |                  | 11.96                | 10.32        | 13.79        |
|           | G0S |            | 120       | 68000      |                  | 9.29                 | 7.70         | 11.11        |
|           | G0T |            | 60        | 16790      |                  | 18.81                | 14.35        | 24.21        |
|           | G0W |            | 80        | 40030      |                  | 10.52                | 8.34         | 13.09        |
|           | G0Y |            | 25        | 9450       |                  | 13.92                | 9.01         | 20.56        |
|           | J0G |            | 40        | 19270      |                  | 10.93                | 7.80         | 14.88        |
|           | J0K |            | 240       | 132200     |                  | 9.55                 | 8.38         | 10.84        |
|           | J0V |            | 60        | 25860      |                  | 12.21                | 9.32         | 15.72        |
|           | J0Z |            | 75        | 38540      |                  | 10.24                | 8.06         | 12.84        |
|           | L0K | ON         | 65        | 32700      |                  | 10.46                | 8.07         | 13.33        |
|           | P0A |            | 40        | 15710      |                  | 13.40                | 9.57         | 18.25        |
|           | R0C | MB         | 95        | 49560      |                  | 10.09                | 8.16         | 12.33        |
|           | S0A | SK         | 130       | 56930      |                  | 12.02                | 10.04        | 14.27        |
|           | S0G |            | 130       | 62640      |                  | 10.92                | 9.13         | 12.97        |
|           | T0B | AB         | 110       | 60550      |                  | 9.56                 | 7.86         | 11.52        |
|           | V0H | BC         | 110       | 50980      |                  | 11.36                | 9.33         | 13.69        |
|           | V0S |            | 25        | 9710       |                  | 13.55                | 8.77         | 20.00        |
|           | V0X |            | 50        | 19960      |                  | 13.18                | 9.78         | 17.38        |
|           |     | Mean Rural |           | 3150       | 1287160          |                      | 12.88        | 12.43        |
| URB       | A1B | NF         | 50        | 17450      |                  | 15.08                | 11.19        | 19.88        |
|           | A1C |            | 35        | 14280      |                  | 12.90                | 8.98         | 17.94        |

|     |    |     |       |       |       |       |
|-----|----|-----|-------|-------|-------|-------|
| A1E |    | 80  | 29400 | 14.32 | 11.36 | 17.82 |
| A1V |    | 25  | 10260 | 12.82 | 8.30  | 18.93 |
| A1Y |    | 15  | 5320  | 14.84 | 8.30  | 24.48 |
| A2N |    | 25  | 9110  | 14.44 | 9.34  | 21.32 |
| B1A | NS | 50  | 17680 | 14.88 | 11.05 | 19.62 |
| B1S |    | 25  | 8550  | 15.39 | 9.96  | 22.72 |
| B2A |    | 30  | 9070  | 17.41 | 11.74 | 24.85 |
| B5A |    | 35  | 13400 | 13.75 | 9.57  | 19.12 |
| E1C | NB | 65  | 29160 | 11.73 | 9.05  | 14.95 |
| E1V |    | 30  | 13220 | 11.94 | 8.06  | 17.05 |
| E1X |    | 30  | 12620 | 12.51 | 8.44  | 17.86 |
| E2A |    | 45  | 18940 | 12.50 | 9.12  | 16.73 |
| E2L |    | 30  | 11050 | 14.29 | 9.64  | 20.40 |
| E2M |    | 40  | 19130 | 11.01 | 7.86  | 14.99 |
| E3N |    | 35  | 14170 | 13.00 | 9.05  | 18.08 |
| G1E | QC | 60  | 25180 | 12.54 | 9.57  | 16.14 |
| G1K |    | 40  | 18270 | 11.52 | 8.23  | 15.69 |
| G1L |    | 50  | 22920 | 11.48 | 8.52  | 15.14 |
| G1V |    | 40  | 18170 | 11.59 | 8.28  | 15.78 |
| G5C |    | 30  | 12740 | 12.39 | 8.36  | 17.69 |
| G5H |    | 20  | 7260  | 14.50 | 8.85  | 22.39 |
| G5L |    | 70  | 31210 | 11.80 | 9.20  | 14.91 |
| G6B |    | 25  | 8280  | 15.89 | 10.28 | 23.46 |
| G6G |    | 55  | 20420 | 14.18 | 10.68 | 18.45 |
| G6V |    | 80  | 35200 | 11.96 | 9.48  | 14.89 |
| G7B |    | 40  | 18620 | 11.31 | 8.08  | 15.40 |
| G7H |    | 65  | 30260 | 11.31 | 8.72  | 14.41 |
| G7X |    | 70  | 27310 | 13.49 | 10.52 | 17.04 |
| G8L |    | 35  | 13190 | 13.97 | 9.73  | 19.42 |
| H1E |    | 85  | 42650 | 10.49 | 8.38  | 12.97 |
| H1G |    | 110 | 49110 | 11.79 | 9.69  | 14.21 |
| H1H |    | 75  | 34700 | 11.38 | 8.95  | 14.26 |
| H1J |    | 25  | 9900  | 13.29 | 8.60  | 19.62 |
| H1L |    | 70  | 32650 | 11.28 | 8.80  | 14.26 |
| H1M |    | 60  | 27510 | 11.48 | 8.76  | 14.78 |
| H1P |    | 45  | 17420 | 13.60 | 9.92  | 18.19 |
| H1R |    | 70  | 29060 | 12.68 | 9.88  | 16.02 |
| H1S |    | 50  | 22340 | 11.78 | 8.74  | 15.53 |
| H1T |    | 85  | 29600 | 15.11 | 12.07 | 18.69 |
| H1X |    | 60  | 28820 | 10.96 | 8.36  | 14.10 |
| H1Z |    | 80  | 34950 | 12.05 | 9.55  | 14.99 |
| H2A |    | 45  | 18510 | 12.80 | 9.33  | 17.12 |
| H2B |    | 40  | 17150 | 12.28 | 8.77  | 16.72 |
| H2E |    | 55  | 24670 | 11.73 | 8.84  | 15.27 |
| H3N |    | 70  | 30160 | 12.22 | 9.52  | 15.43 |
| H3V |    | 20  | 6550  | 16.07 | 9.81  | 24.82 |
| H4G |    | 75  | 28700 | 13.75 | 10.82 | 17.24 |
| H4H |    | 50  | 19480 | 13.51 | 10.03 | 17.81 |

|     |     |       |       |       |       |
|-----|-----|-------|-------|-------|-------|
| H4V | 55  | 20620 | 14.04 | 10.57 | 18.27 |
| H4W | 90  | 23300 | 20.33 | 16.35 | 24.99 |
| H7G | 45  | 20140 | 11.76 | 8.58  | 15.74 |
| H7V | 60  | 20490 | 15.41 | 11.76 | 19.84 |
| H8N | 55  | 26490 | 10.93 | 8.23  | 14.22 |
| H8P | 55  | 22410 | 12.92 | 9.73  | 16.81 |
| J1G | 40  | 19250 | 10.94 | 7.81  | 14.89 |
| J1T | 25  | 7860  | 16.74 | 10.83 | 24.71 |
| J1X | 55  | 26440 | 10.95 | 8.25  | 14.25 |
| J3R | 30  | 13310 | 11.86 | 8.00  | 16.94 |
| J4K | 60  | 25480 | 12.39 | 9.46  | 15.95 |
| J6E | 85  | 38200 | 11.71 | 9.35  | 14.48 |
| J6S | 50  | 22830 | 11.53 | 8.55  | 15.20 |
| J7Y | 40  | 19470 | 10.81 | 7.72  | 14.72 |
| J8H | 30  | 13050 | 12.10 | 8.16  | 17.27 |
| J9E | 20  | 8100  | 13.00 | 7.93  | 20.07 |
| J9X | 55  | 28000 | 10.34 | 7.79  | 13.46 |
| J9Z | 20  | 8090  | 13.01 | 7.94  | 20.10 |
| L2E | 45  | 21410 | 11.06 | 8.07  | 14.80 |
| L2T | 25  | 10780 | 12.21 | 7.90  | 18.02 |
| L3K | 40  | 18660 | 11.28 | 8.06  | 15.36 |
| L8G | 45  | 22200 | 10.67 | 7.78  | 14.28 |
| L8K | 80  | 32510 | 12.95 | 10.27 | 16.12 |
| L8R | 30  | 10650 | 14.83 | 10.00 | 21.17 |
| L8T | 45  | 19270 | 12.29 | 8.96  | 16.45 |
| M1R | 65  | 28730 | 11.91 | 9.19  | 15.18 |
| M1S | 70  | 34650 | 10.63 | 8.29  | 13.43 |
| M1T | 65  | 33240 | 10.29 | 7.94  | 13.12 |
| M1W | 100 | 49910 | 10.55 | 8.58  | 12.83 |
| M2M | 80  | 29990 | 14.04 | 11.13 | 17.47 |
| M2R | 110 | 38430 | 15.06 | 12.38 | 18.16 |
| M3H | 65  | 32210 | 10.62 | 8.20  | 13.54 |
| M3J | 50  | 24270 | 10.84 | 8.05  | 14.30 |
| M3M | 60  | 23730 | 13.31 | 10.15 | 17.13 |
| M3N | 85  | 44820 | 9.98  | 7.97  | 12.34 |
| M4A | 30  | 13670 | 11.55 | 7.79  | 16.49 |
| M4J | 70  | 35710 | 10.32 | 8.04  | 13.04 |
| M6A | 40  | 18530 | 11.36 | 8.12  | 15.47 |
| M6C | 55  | 24730 | 11.71 | 8.82  | 15.24 |
| M6E | 85  | 39790 | 11.24 | 8.98  | 13.90 |
| M6G | 65  | 32970 | 10.38 | 8.01  | 13.23 |
| M6H | 90  | 45300 | 10.46 | 8.41  | 12.85 |
| M6J | 60  | 29530 | 10.69 | 8.16  | 13.77 |
| M6K | 65  | 33900 | 10.09 | 7.79  | 12.86 |
| M6L | 55  | 20950 | 13.82 | 10.41 | 17.99 |
| M6M | 80  | 40870 | 10.30 | 8.17  | 12.82 |
| M6N | 85  | 41110 | 10.88 | 8.69  | 13.46 |
| M8Z | 35  | 13670 | 13.48 | 9.38  | 18.74 |

|            |    |      |         |       |       |       |
|------------|----|------|---------|-------|-------|-------|
| M9B        |    | 60   | 28220   | 11.19 | 8.54  | 14.40 |
| M9C        |    | 85   | 35630   | 12.56 | 10.03 | 15.53 |
| M9M        |    | 45   | 19980   | 11.85 | 8.65  | 15.86 |
| M9P        |    | 45   | 20350   | 11.64 | 8.49  | 15.57 |
| P3E        |    | 60   | 26580   | 11.88 | 9.07  | 15.29 |
| P6B        |    | 50   | 23620   | 11.14 | 8.27  | 14.69 |
| P7B        |    | 70   | 30130   | 12.23 | 9.53  | 15.45 |
| R2H        | MB | 45   | 15480   | 15.30 | 11.16 | 20.47 |
| R2K        |    | 65   | 32530   | 10.52 | 8.12  | 13.40 |
| R2V        |    | 70   | 30570   | 12.05 | 9.39  | 15.23 |
| R2W        |    | 55   | 27960   | 10.35 | 7.80  | 13.48 |
| R2X        |    | 45   | 16360   | 14.48 | 10.56 | 19.37 |
| R3M        |    | 45   | 22090   | 10.72 | 7.82  | 14.35 |
| R7N        |    | 25   | 10090   | 13.04 | 8.44  | 19.25 |
| S4H        | SK | 25   | 10980   | 11.98 | 7.75  | 17.69 |
| S4P        |    | 30   | 12480   | 12.65 | 8.53  | 18.06 |
| S4T        |    | 65   | 32350   | 10.58 | 8.16  | 13.48 |
| T1A        | AB | 55   | 26160   | 11.07 | 8.34  | 14.40 |
| T2G        |    | 25   | 10900   | 12.07 | 7.81  | 17.82 |
| T5B        |    | 35   | 15890   | 11.59 | 8.07  | 16.12 |
| T5E        |    | 65   | 30550   | 11.20 | 8.64  | 14.27 |
| T5L        |    | 45   | 16390   | 14.45 | 10.54 | 19.34 |
| T5R        |    | 50   | 25050   | 10.51 | 7.80  | 13.85 |
| T6C        |    | 40   | 19230   | 10.95 | 7.82  | 14.91 |
| T9C        |    | 20   | 7010    | 15.02 | 9.17  | 23.19 |
| V1R        | BC | 30   | 9950    | 15.87 | 10.70 | 22.65 |
| V1T        |    | 60   | 31040   | 10.17 | 7.76  | 13.10 |
| V1Y        |    | 80   | 31970   | 13.17 | 10.44 | 16.39 |
| V2A        |    | 75   | 35040   | 11.27 | 8.86  | 14.12 |
| V5H        |    | 70   | 32850   | 11.22 | 8.74  | 14.17 |
| V5M        |    | 45   | 21790   | 10.87 | 7.93  | 14.54 |
| V6A        |    | 55   | 16530   | 17.51 | 13.19 | 22.79 |
| V8A        |    | 45   | 17930   | 13.21 | 9.63  | 17.68 |
| V8S        |    | 40   | 16630   | 12.66 | 9.04  | 17.24 |
| V8V        |    | 50   | 23770   | 11.07 | 8.22  | 14.60 |
| V9K        |    | 30   | 13530   | 11.67 | 7.87  | 16.66 |
| Mean Urban |    | 7040 | 3073100 | 12.06 | 11.78 | 12.34 |
